# Supplementary material for: Etiology of ‘Sinus Headache’—Moving the Focus from Rhinology to Neurology. A Systematic Review
Source: Brain Sci. 2021 Jan 9;11(1):79. doi: 10.3390/brainsci11010079 (PMC7827425; doi:10.3390/brainsci11010079)
Supplement: Supplementary file 1 [file brainsci-11-00079-s001.zip › brainsci-1048792-supplement 1-grading table.pdf]

Review

# Etiology of ‘Sinus Headache’ – Moving the Focus from Rhinology to Neurology. A Systematic Review

## SUPPLEMENTARY MATERIALS

## PREVALENCE STUDIES BIAS RISK ASSESSMENT

Straburzyński Marcin, Gryglas-Dworak Anna, Nowaczewska Magdalena, Brożek-Mądry Eliza and Martelletti Paolo

Table 1. Assessment of the risk of bias in prevalence studies of ‘sinus headache’.

Item (column):

- A. Was the sampling frame a true or close representation of the target population (i.e. patients complaining ‘sinus headache and/or facial pain’ (SH)? - “No” was marked when important data concerning population was lacking.
- B. Was some form of random selection used to select the sample, or was a census undertaken?
- C. Was the likelihood of non-response bias minimal? - “No” was marked in all studies that did not provide data on number of subjects lost to follow-up during diagnostic process or if number lost to follow-up was higher than 20%.
- D. Was data collected directly from the participants (as opposed to a proxy)?
- E. Was the study's target population a close representation of the analyzed population in relation to relevant variables? - “No” was marked if authors presented no data regarding this subject or no comparable control group was present.
- F. Was an acceptable case definition used in the study? - “Yes” was marked if diagnosis was consistent with recommended disease definitions (i.e. International Classification of Headache Disorders, sinusitis confirmed/excluded by either nasal endoscopy or/and computed tomography (CT)).
- G. Was the study instrument that measured the parameter of interest shown to have validity and reliability? - “Yes” was marked if the diagnosis was established by a physician with strict adherence to disease definitions.
- H. Was the same mode of data collection used for all participants? - “No” was marked if any diagnostic procedures were omitted in some of the subjects.
- I. Was the length of the shortest prevalence period for the parameter of interest appropriate? - “Yes” was marked in all cases of appropriately established diagnosis
- J. Where the numerator(s) and denominator(s) for the parameter of interest appropriate?

|     | A | B | C | D | E | F | G | H | I | J | Total |
|-----|---|---|---|---|---|---|---|---|---|---|-------|
| [1] | 0 | 1 | 1 | 0 | 1 | 1 | 1 | 0 | 0 | 0 | 4     |
| [2] | 0 | 1 | 1 | 0 | 1 | 1 | 1 | 0 | 0 | 0 | 5     |
| [3] | 1 | 1 | 1 | 0 | 1 | 1 | 1 | 1 | 0 | 0 | 7     |
| [4] | 0 | 1 | 1 | 0 | 1 | 1 | 1 | 0 | 0 | 0 | 5     |
| [5] | 0 | 0 | 1 | 0 | 0 | 1 | 1 | 0 | 0 | 0 | 3     |
| [6] | 1 | 1 | 1 | 0 | 1 | 0 | 1 | 0 | 0 | 0 | 5     |
| [7] | 0 | 1 | 1 | 0 | 1 | 0 | 1 | 1 | 0 | 0 | 5     |

|      |   |   |   |   |   |   |   |   |   |   |   |
|------|---|---|---|---|---|---|---|---|---|---|---|
| [8]  | 0 | 1 | 1 | 0 | 1 | 0 | 0 | 1 | 0 | 0 | 4 |
| [9]  | 0 | 1 | 1 | 0 | 1 | 0 | 0 | 1 | 0 | 0 | 4 |
| [10] | 1 | 1 | 1 | 0 | 1 | 0 | 1 | 1 | 0 | 0 | 6 |

Low risk 0-3 Yes = 0

Moderate risk 4-6 No = 1

High risk 7-10

## References

- West, B.; Jones, N.S. Endoscopy-Negative, Computed Tomography-Negative Facial Pain in a Nasal Clinic: Laryngoscope **2001**, *111*, 581–586, doi:10.1097/00005537-200104000-00006.
- Paulson, E.P.; Graham, S.M. Neurologic Diagnosis and Treatment in Patients with Computed Tomography and Nasal Endoscopy Negative Facial Pain: Laryngoscope **2004**, *114*, 1992–1996, doi:10.1097/01.mlg.0000147935.59755.45.
- Perry, B.F.; Login, I.S.; Kountakis, S.E. Nonrhinologic Headache in a Tertiary Rhinology Practice. Otolaryngol. Head Neck Surg. **2004**, *130*, 449–452, doi:10.1016/j.otohns.2004.01.005.
- Schreiber, C.P.; Hutchinson, S.; Webster, C.J.; Ames, M.; Richardson, M.S.; Powers, C. Prevalence of Migraine in Patients With a History of Self-Reported or Physician-Diagnosed “Sinus” Headache. Arch. Intern. Med. **2004**, *164*, 1769, doi:10.1001/archinte.164.16.1769.
- Eross, E.; Dodick, D.; Eross, M. The Sinus, Allergy and Migraine Study (SAMS): CME. Headache J. Head Face Pain **2007**, *47*, 213–224, doi:10.1111/j.1526-4610.2006.00688.x.
- Mehle, M.E.; Kremer, P.S. Sinus CT Scan Findings in “Sinus Headache” Migraineurs. Headache **2007**, *0*, 070516095856009, doi:10.1111/j.1526-4610.2007.00811.x.
- Şenbil, N.; Gürer, Y.K.Y.; Üner, Ç.; Barut, Y. Sinusitis in Children and Adolescents with Chronic or Recurrent Headache: A Case–Control Study. J. Headache Pain **2008**, *9*, 33–36, doi:10.1007/s10194-008-0007-0.
- Foroughipour, M.; Sharifian, S.M.R.; Shoeibi, A.; Ebdali Barabad, N.; Bakhshaei, M. Causes of Headache in Patients with a Primary Diagnosis of Sinus Headache. Eur. Arch. Oto-Rhino-Laryngol. **2011**, *268*, 1593–1596, doi:10.1007/s00405-011-1643-6.
- Kaymakci, M.; Cikrikler, H.I.; Pay, G. The Aetiology Underlying Sinus Headaches. Journal of International Medical Research **2013**, *41*, 218–223, doi:10.1177/0300060513475382.
- Lal, D.; Rounds, A.B.; Rank, M.A.; Divekar, R. Clinical and 22-Item Sino-Nasal Outcome Test Symptom Patterns in Primary Headache Disorder Patients Presenting to Otolaryngologists with “Sinus” Headaches, Pain or Pressure: SNOT-22 Symptoms in Primary Headache Patients. Int. Forum Allergy Rhinol. **2015**, *5*, 408–416, doi:10.1002/alr.21502.
