# Supplementary material for: Etiology of ‘Sinus Headache’—Moving the Focus from Rhinology to Neurology. A Systematic Review
Source: Brain Sci. 2021 Jan 9;11(1):79. doi: 10.3390/brainsci11010079 (PMC7827425; doi:10.3390/brainsci11010079)
Supplement: Supplementary file 1 [file brainsci-11-00079-s001.zip › brainsci-1048792-supplement 2-references.pdf]

Review

# Etiology of ‘Sinus Headache’ – Moving the Focus from Rhinology to Neurology. A Systematic Review

## SUPPLEMENTARY MATERIALS

## REFERENCES OF FULL TEXT STUDIES SCREENED IN THE SELECTION PROCESS

**Straburzyński Marcin, Gryglas-Dworak Anna, Nowaczewska Magdalena, Brożek-Mądry Eliza and Martelletti Paolo**

1. Abu-Bakra M, Jones NS. Prevalence of nasal mucosal contact points in patients with facial pain compared with patients without facial pain. *J Laryngol Otol* 2001;115. <https://doi.org/10.1258/0022215011908685>.
2. Abu-Samra M, Gawad OA, Agha M. The outcomes for nasal contact point surgeries in patients with unsatisfactory response to chronic daily headache medications. *Eur Arch Otorhinolaryngol* 2011;268:1299–304. <https://doi.org/10.1007/s00405-011-1590-2>.
3. Acquadro MA, Montgomery WW. Treatment of Chronic Paranasal Sinus Pain with Minimal Sinus Disease. *Ann Otol Rhinol Laryngol* 1996;105:607–14. <https://doi.org/10.1177/000348949610500804>.
4. Acquadro MA, Salman SD, Joseph MP. Analysis of Pain and Endoscopic Sinus Surgery for Sinusitis. *Ann Otol Rhinol Laryngol* 1997;106:305–9. <https://doi.org/10.1177/000348949710600408>.
5. Adnan, Ihsanullah, Khan S, Haq A, Javaid, Shahabi I. Rhinogenic headache and its management. *J Med Sci (Peshawar, Print)* 2015;23:206–8.
6. Afifi AM, Schwarze ML, Stilp EK, Orne J, Smith JP, Abd-Elsayed AA, et al. “Like a Normal Person Again”: A Qualitative Analysis of the Impact of Headache Surgery. *Plastic and Reconstructive Surgery* 2019;144:956–64. <https://doi.org/10.1097/PRS.0000000000006071>.
7. Agius AM, Jones NS, Muscat R. Prospective three-year follow up of a cohort study of 240 patients with chronic facial pain. *J Laryngol Otol* 2014;128:518–26. <https://doi.org/10.1017/S0022215114000929>.
8. Agius AM. Long-term follow-up of patients with facial pain in chronic rhinosinusitis--correlation with nasal endoscopy and CT. *Rhinology* 2010;48:65–70. <https://doi.org/10.4193/Rhin09.015>.
9. Al-Hashel JY, Ahmed SF, Alroughani R, Goadsby PJ. Migraine misdiagnosis as a sinusitis, a delay that can last for many years. *The Journal of Headache and Pain* 2013;14:97. <https://doi.org/10.1186/1129-2377-14-97>.
10. Al-Obiedi SHI. Sinusitis in self-described and physician diagnosed patients as sinus headache. *Tikrit Medical Journal* 2012;18:106–14.
11. Albirmawy. Middle Turbinate Evacuation Conchoplasty in Management of Contact-Point Rhinogenic Headache in Children. *Int J Clin Pediatr* 2012. <https://doi.org/10.4021/ijcp53w>.
12. Aljeraisi T. Diagnostic Dilemma of Sinus Headache and Migraine. *Ulutas Med J* 2020;6:107. <https://doi.org/10.5455/umj.20200507094603>.

13. Anselmo-Lima WT, Oliveira JAA, Speciali JG, Bordini C, Santos AC, Rocha KV, et al. Middle Turbinate Headache Syndrome. *Headache* 1997;37:102–6. <https://doi.org/10.1046/j.1526-4610.1997.3702102.x>.
14. Barinsky GL, Hanba C, Svider PF. Rhinogenic Headache in Children and Adolescents. *Curr Pain Headache Rep* 2020;24:7. <https://doi.org/10.1007/s11916-020-0839-0>.
15. Behin F, Behin B, Bigal M, Lipton R. Surgical Treatment of Patients with Refractory Migraine Headaches and Intranasal Contact Points. *Cephalalgia* 2005;25:439–43. <https://doi.org/10.1111/j.1468-2982.2004.00877.x>.
16. Behin F, Behin B, Behin D, Baredes S. Surgical Management of Contact Point Headaches. *Headache: The Journal of Head and Face Pain* 2005;45:204–10. <https://doi.org/10.1111/j.1526-4610.2005.05045.x>.
17. Bektas D, Alioglu Z, Akyol N, Ural A, Bahadir O, Caylan R. Surgical Outcomes for Rhinogenic Contact Point Headaches. *Med Princ Pract* 2011;20:29–33. <https://doi.org/10.1159/000322076>.
18. Bilal N, Selcuk A, Karakus MF, Ikinciogullari A, Ensari S, Dere H. Impact of Corrective Rhinologic Surgery on Rhinogenic Headache: *Journal of Craniofacial Surgery* 2013;24:1688–91. <https://doi.org/10.1097/SCS.0b013e31827c7d8f>.
19. Boonchoo R. Functional endoscopic sinus surgery in patients with sinogenic headache. *J Med Assoc Thai* 1997;80:521–6.
20. Bugten V, Nordgård S, Steinsvåg S. Long-term effects of postoperative measures after sinus surgery. *Eur Arch Otorhinolaryngol* 2008;265:531–7. <https://doi.org/10.1007/s00405-007-0501-z>.
21. Cady, R.K.; Schreiber, C.P. Sinus headache: a clinical conundrum. *Otolaryngol. Clin. North Am.* 2004, 37, 267–288, doi:10.1016/S0030-6665(03)00181-6.
22. Cashman EC, Smyth D. Primary headache syndromes and sinus headache: An approach to diagnosis and management. *Auris Nasus Larynx* 2012;39:257–60. <https://doi.org/10.1016/j.anl.2011.05.003>.
23. Charleston L, Strabbing R, Cooper W. Is Sinus Disease the Cause of my Headaches? An Update on Sinus Disease and Headache. *Curr Pain Headache Rep* 2014;18:418. <https://doi.org/10.1007/s11916-014-0418-3>.
24. Chester AC, Antisdell JL, Sindwani R. Symptom-specific outcomes of endoscopic sinus surgery: A systematic review. *Otolaryngol Head Neck Surg* 2009;140:633–9. <https://doi.org/10.1016/j.otohns.2008.12.048>.
25. Choi JW, Kim EH, Ryu IS, Lim HW, Song YJ, Yeo N-K. Headache Characteristics in Rhinologic Patients and the Role of Surgical Treatment. *J Rhinol* 2015;22:11. <https://doi.org/10.18787/jr.2015.22.1.11>.
26. Chow JM. Rhinologic Headaches. *Otolaryngol Head Neck Surg* 1994;111:211–8. <https://doi.org/10.1177/01945998941113P109>.
27. Clerico DM. Pneumatized Superior Turbinate as a Cause of Referred Migraine Headache. *Laryngoscope* 1996;106:874–9. <https://doi.org/10.1097/00005537-199607000-00017>.
28. Clerico DM. Sinus Headaches Reconsidered: Referred Cephalgia of Rhinologic Origin Masquerading as Refractory Primary Headaches. *Headache* 1995;35:185–92. <https://doi.org/10.1111/j.1526-4610.1995.hed3504185.x>.

29. Clifton NJ, Jones NS. Prevalence of facial pain in 108 consecutive patients with paranasal mucopurulent discharge at endoscopy. *J Laryngol Otol* 2007;121:345–8. <https://doi.org/10.1017/S0022215106002647>.
30. Cook PR, Nishioka GJ, Davis WE, McKinsey JP. Functional Endoscopic Sinus Surgery in Patients with Normal Computed Tomography Scans. *Otolaryngol Head Neck Surg* 1994;110:505–9. <https://doi.org/10.1177/019459989411000606>.
31. Cutler J, Bikhazi N, Light J, Truitt T, Schwartz M, the REMODEL Study Investigators, et al. Standalone Balloon Dilation versus Sinus Surgery for Chronic Rhinosinusitis: A Prospective, Multicenter, Randomized, Controlled Trial. *Am J Rhinol Allergy* 2013;27:416–22. <https://doi.org/10.2500/ajra.2013.27.3970>.
32. Dadgarnia MH, Atighechi S, Baradaranfar MH. The response to sodium valproate of patients with sinus headaches with normal endoscopic and CT findings. *Eur Arch Otorhinolaryngol* 2010;267:375–9. <https://doi.org/10.1007/s00405-009-1090-9>.
33. Daudia AT, Jones NS. Facial migraine in a rhinological setting. *Clinical Otolaryngology and Allied Sciences* 2002;27:521–5. <https://doi.org/10.1046/j.1365-2273.2002.00628.x>.
34. DeConde AS, Mace JC, Smith TL. The impact of comorbid migraine on quality-of-life outcomes after endoscopic sinus surgery: Impact of Comorbid Migraine on Outcomes of Endoscopic Sinus surgery. *The Laryngoscope* 2014;124:1750–5. <https://doi.org/10.1002/lary.24592>.
35. El-Silimy O. The place of endonasal endoscopy in the relief of middle turbinate sinonasal headache syndrome. *Rhinology* 1995;33:244–5.
36. Eross E, Dodick D, Eross M. The Sinus, Allergy and Migraine Study (SAMS).: CME. Headache: The Journal of Head and Face Pain 2007;47:213–24. <https://doi.org/10.1111/j.1526-4610.2006.00688.x>.
37. Faleck H, Rothner AD, Erenberg G, Cruse RP. Headache and Subacute Sinusitis in Children and Adolescents. *Headache* 1988;28:96–8. <https://doi.org/10.1111/j.1526-4610.1988.hed2802096.x>.
38. Farmer RL, Garg RK, Afifi AM. Can Functional Nasal Surgery Treat Chronic Headaches? A Systematic Review: Plastic and Reconstructive Surgery 2018;142:1583–92. <https://doi.org/10.1097/PRS.0000000000004989>.
39. Foroughipour M, Sharifian SMR, Shoeibi A, Ebdali Barabad N, Bakhshae M. Causes of headache in patients with a primary diagnosis of sinus headache. *European Archives of Oto-Rhino-Laryngology* 2011;268:1593–6. <https://doi.org/10.1007/s00405-011-1643-6>.
40. Gerbe RW, Fry TL, Fischer ND. Headache of Nasal Spur Origin: an Easily Diagnosed and Surgically Correctable Cause of Facial Pain. *Headache* 1984;24:329–30. <https://doi.org/10.1111/j.1526-4610.1984.hed2406329.x>.
41. Ghazipour A, Abshirini H, Hekmat Shoar M, Pursalehan S. Sinonasal headaches and post-operative outcomes after septoplasty in patients with nasal septal deviation. *Iran J Otorhinolaryngol* 2011;23:133–9.
42. Giacomini PG, Alessandrini M, DePadova A. Septoturbinal surgery in contact point headache syndrome: long-term results. *Cranio* 2003;21:130–5.
43. Hamilton JG, Haynes SN, Gannon L, Safranek RA. Sinus Headache: A Psychophysiological Study. *Headache* 1980;20:258–60. <https://doi.org/10.1111/j.1526-4610.1980.hed2005258.x>.
44. Hammad MS, Gomaa MA. Role of some anatomical nasal abnormalities in rhinogenic headache. *Egyptian Journal of Ear, Nose, Throat and Allied Sciences* 2012;13:31–5. <https://doi.org/10.1016/j.ejenta.2012.01.006>.

45. Harley DH, Powitzky ES, Duncavage J. Clinical Outcomes for the Surgical Treatment of Sinonasal Headache. *Otolaryngol Head Neck Surg* 2003;129:217–21. [https://doi.org/10.1016/S0194-5998\(03\)00623-5](https://doi.org/10.1016/S0194-5998(03)00623-5).
46. Harrison L, Jones NS. Intranasal contact points as a cause of facial pain or headache: a systematic review. *Clinical Otolaryngology* 2013;38:8–22. <https://doi.org/10.1111/coa.12081>.
47. Hoover S. The nasal patho-physiology of headaches and migraines. Diagnosis and treatment of the allergy, infection and nasal septal spurs that cause them. *Rhinol Suppl* 1987;2:1–23.
48. Huang H-H, Lee T-J, Huang C-C, Chang P-H, Huang S-F. Non-sinusitis-related rhinogenous headache: a ten-year experience. *American Journal of Otolaryngology* 2008;29:326–32. <https://doi.org/10.1016/j.amjoto.2007.10.001>.
49. Ishkanian G, Blumenthal H, Webster CJ, Richardson MS, Ames M. Efficacy of sumatriptan tablets in migraineurs self-described or physician-diagnosed as having sinus headache: A randomized, double-blind, placebo-controlled study. *Clinical Therapeutics* 2007;29:99–109. <https://doi.org/10.1016/j.clinthera.2007.01.012>.
50. Jayawardena ADL, Chandra R. Headaches and Facial Pain in Rhinology. *Am J Rhinol Allergy* 2018;32:12–5. <https://doi.org/10.2500/ajra.2018.32.4501>.
51. Jones NS. Midfacial segment pain: implications for rhinitis and sinusitis. *Curr Allergy Asthma Rep* 2004;4:187–92. <https://doi.org/10.1007/s11882-004-0025-1>.
52. Kari E, DelGaudio JM. Treatment of Sinus Headache as Migraine: The Diagnostic Utility of Triptans: The Laryngoscope 2008;118:2235–9. <https://doi.org/10.1097/MLG.0b013e318182f81d>.
53. Kaur A, Singh A. Clinical study of headache in relation to sinusitis and its management. *J Med Life* 2013;6:389–94.
54. Kaymakci M, Cikrikler HI, Pay G. The aetiology underlying sinus headaches. *Journal of International Medical Research* 2013;41:218–23. <https://doi.org/10.1177/0300060513475382>.
55. Kirsch CFE. Headache Caused by Sinus Disease. *Neuroimaging Clinics of North America* 2019;29:227–41. <https://doi.org/10.1016/j.nic.2019.01.003>.
56. Koch-Henriksen N, Gammelgaard N, Hvidegaard T, Stoksted P. Chronic headache: the role of deformity of the nasal septum. *BMJ* 1984;288:434–5. <https://doi.org/10.1136/bmj.288.6415.434>.
57. Kunachak S. Middle Turbinate Lateralization: A Simple Treatment for Rhinologic Headache: The Laryngoscope 2002;112:870–2. <https://doi.org/10.1097/00005537-200205000-00017>.
58. La Mantia I, Grillo C, Andaloro C. Rhinogenic Contact Point Headache: Surgical Treatment Versus Medical Treatment. *Journal of Craniofacial Surgery* 2017;1. <https://doi.org/10.1097/SCS.00000000000004211>.
59. Lal D, Rounds AB, Rank MA, Divekar R. Clinical and 22-item Sino-Nasal Outcome Test symptom patterns in primary headache disorder patients presenting to otolaryngologists with “sinus” headaches, pain or pressure: SNOT-22 symptoms in primary headache patients. *International Forum of Allergy & Rhinology* 2015;5:408–16. <https://doi.org/10.1002/alr.21502>.
60. Lal D, Rounds A, Dodick DW. Comprehensive management of patients presenting to the otolaryngologist for Sinus pressure, pain, or headache: Sinus Headache Management. *The Laryngoscope* 2015;125:303–10. <https://doi.org/10.1002/lary.24926>.

61. Laury AM, Chen PG, McMains KC. Randomized Controlled Trial Examining the Effects of Balloon Catheter Dilation on “Sinus Pressure” / Barometric Headaches. *Otolaryngol Head Neck Surg* 2018;159:178–84. <https://doi.org/10.1177/0194599818772818>.
62. Lee J-H, Kim H-J, Hong Y-H, Kim K-S. Underestimation of Rhinogenic Causes in Patients Presenting to the Emergency Department with Acute Headache. *Acta Neurol Taiwan* 2015;24:37–42.
63. Lee SH, Kim Y, Lim TY. Efficacy of sphenopalatine ganglion block in nasal mucosal headache presenting as facial pain. *CRANIO®* 2018;1–3. <https://doi.org/10.1080/08869634.2018.1475859>.
64. Leong SC, Lazarova L, Tsang HK, Banhegyi G. Treatment outcomes of midfacial segment pain: experience from the Liverpool multi-disciplinary team facial pain clinic. *Rhin* 2015;53:35–40. <https://doi.org/10.4193/Rhin14.156>.
65. Leong SC, Tsang HK, Wilkie MD, Banhegyi G. Characterisation of patients with endoscopy-negative, computer tomography-negative midfacial segment pain using the sino-nasal outcome test. *Rhin* 2014;52:78–83. <https://doi.org/10.4193/Rhin13.123>.
66. Lin S-H, Ho C-Y. Paranasal Sinus Pathologies in Patients Presenting with Headache as the Primary Symptom. *Cephalalgia* 2006;26:423–7. <https://doi.org/10.1111/j.1468-2982.2005.01058.x>.
67. Low WK, Willatt DJ. Headaches Associated With Nasal Obstruction Due to Deviated Nasal Septum. *Headache* 1995;35:404–6. <https://doi.org/10.1111/j.1526-4610.1995.hed3507404.x>.
68. Madani SA, Hashemi SA, Morshedzadeh SA. Results of Functional Endoscopic Sinus Surgery in Patients with Mucosal Contact Points Suffering From Chronic Daily Headache Non-Responding to Medications. *Acta Facultatis Medicae Naissensis* 2013;30:159–64. <https://doi.org/10.2478/afmnai-2013-0008>.
69. Mariotti LJ, Setliff RC, Ghaderi M, Voth S. Patient history and CT findings in predicting surgical outcomes for patients with rhinogenic headache. *Ear Nose Throat J* 2009;88:926–9.
70. Marzetti A, Mazzone S, Tedaldi M, Topazio D, Passali FM. The Role of Balloon Sinuplasty in the Treatment of Vacuum Rhinogenic Headache. *Indian J Otolaryngol Head Neck Surg* 2017;69:216–20. <https://doi.org/10.1007/s12070-017-1086-5>.
71. Marzetti A, Tedaldi M, Passali FM. The role of balloon sinuplasty in the treatment of sinus headache. *Otolaryngologia Polska* 2014;68:15–9. <https://doi.org/10.1016/j.otpol.2013.10.005>.
72. Maurya A, Qureshi S, Jadia S, Maurya M. “Sinus Headache”: Diagnosis and Dilemma?? An Analytical and Prospective Study. *Indian J Otolaryngol Head Neck Surg* 2019;71:367–70. <https://doi.org/10.1007/s12070-019-01603-3>.
73. Mehle ME, Kremer PS. Sinus CT Scan Findings in “Sinus Headache” Migraineurs. *Headache* 2007;0:070516095856009-??? <https://doi.org/10.1111/j.1526-4610.2007.00811.x>.
74. Mohebbi A, Memari F, Mohebbi S. Endonasal Endoscopic Management of Contact Point Headache and Diagnostic Criteria. *Headache: The Journal of Head and Face Pain* 2010;50:242–8. <https://doi.org/10.1111/j.1526-4610.2009.01520.x>.
75. Mokbel KM, Abd Elfattah AM, Kamal E-S. Nasal mucosal contact points with facial pain and/or headache: lidocaine can predict the result of localized endoscopic resection. *Eur Arch Otorhinolaryngol* 2010;267:1569–72. <https://doi.org/10.1007/s00405-010-1245-8>.
76. Moretz WH, Kountakis SE. Subjective Headache before and after Endoscopic Sinus Surgery. *American Journal of Rhinology* 2006;20:305–7. <https://doi.org/10.2500/ajr.2006.20.2856>.

77. Parsons DS, Batra PS. Functional Endoscopic Sinus Surgical Outcomes for Contact Point Headaches. *Laryngoscope* 1998;108:696–702. <https://doi.org/10.1097/00005537-199805000-00013>.
78. Patel ZM, Kennedy DW, Setzen M, Poetker DM, DelGaudio JM. “Sinus headache”: rhinogenic headache or migraine? An evidence-based guide to diagnosis and treatment: “Sinus headache”: rhinogenic headache or migraine? *INTERNATIONAL FORUM OF ALLERGY AND RHINOLOGY* 2013;3:221–30. <https://doi.org/10.1002/alr.21095>.
79. Patel ZM, Setzen M, Poetker DM, DelGaudio JM. Evaluation and Management of “Sinus Headache” in the Otolaryngology Practice. *Otolaryngologic Clinics of North America* 2014;47:269–87. <https://doi.org/10.1016/j.otc.2013.10.008>.
80. Paulson EP, Graham SM. Neurologic Diagnosis and Treatment in Patients with Computed Tomography and Nasal Endoscopy Negative Facial Pain: The *Laryngoscope* 2004;114:1992–6. <https://doi.org/10.1097/01.mlg.0000147935.59755.45>.
81. Pedram D, Jennifer H, John M. “Sinus Headache” in Chronic Rhinosinusitis (CRS): An Analysis of Otolaryngology Initiated Treatment Efficacy of Migraine in the CRS Patient. *Journal of Sinusitis and Migraine* 2016;1:1–4.
82. Perry BF, Login IS, Kountakis SE. Nonrhinologic Headache in a Tertiary Rhinology Practice. *Otolaryngology–Head and Neck Surgery* 2004;130:449–52. <https://doi.org/10.1016/j.otohns.2004.01.005>.
83. Peter J C. Analysis of headache outcomes in patients treated with nasal and sinus surgery. *Arch Otolaryngol Rhinol* 2019;020–5. <https://doi.org/10.17352/aor.000090>.
84. Rai U, Devi P, Singh N, Lyngdoh N, Sudhiranjan T, Nongthombam N. Contact point headache: Diagnosis and management in a tertiary care center in Northeast India. *J Med Soc* 2018;32:51. [https://doi.org/10.4103/jms.jms\\_69\\_16](https://doi.org/10.4103/jms.jms_69_16).
85. Ramadan HH. Nonsurgical versus Endoscopic Sinonasal Surgery for Rhinogenic Headache. *American Journal of Rhinology* 1999;13:455–7. <https://doi.org/10.2500/105065899781329656>.
86. Rebeiz EE, Rastani K. Sinonasal facial pain. *Otolaryngologic Clinics of North America* 2003;36:1119–26. [https://doi.org/10.1016/S0030-6665\(03\)00122-1](https://doi.org/10.1016/S0030-6665(03)00122-1).
87. Roozbahany NA, Nasri S. Nasal and paranasal sinus anatomical variations in patients with rhinogenic contact point headache. *Auris Nasus Larynx* 2013;40:177–83. <https://doi.org/10.1016/j.anl.2012.07.007>.
88. Ryan RE, Kern EB. Rhinologic Causes of Facial Pain and Headache. *Headache* 1978;18:44–50. <https://doi.org/10.1111/j.1526-4610.1978.hed1801044.x>.
89. Sadeghi M, Saedi B, Ghaderi Y. Endoscopic Management of Contact Point Headache in Patients Resistant to Medical Treatment. *Indian J Otolaryngol Head Neck Surg* 2013;65:415–20. <https://doi.org/10.1007/s12070-013-0629-7>.
90. Sanderson RJ, Rivron RP. The effect of septal surgery on nasal symptoms. *Rhinology* 1992;30:17–20.
91. Sanges G, Feleppa M, Gamera M, Sorrentino G, Luca R, Merone M, et al. Fronto-turbinalis Sinus Expansion and Headache. *Curr Pain Headache Rep* 2011;15:308–13. <https://doi.org/10.1007/s11916-011-0194-2>.
92. Schønsted-Madsen U, Stoksted P, Christensen P-H, Koch-henriksen N. Chronic headache related to nasal obstruction. *J Laryngol Otol* 1986;100:165–70. <https://doi.org/10.1017/S0022215100098911>.

93. Schreiber CP, Hutchinson S, Webster CJ, Ames M, Richardson MS, Powers C. Prevalence of Migraine in Patients With a History of Self-reported or Physician-Diagnosed “Sinus” Headache. *Archives of Internal Medicine* 2004;164:1769. <https://doi.org/10.1001/archinte.164.16.1769>.
94. Şenbil, N.; Gürer, Y.K.Y.; Üner, Ç.; Barut, Y. Sinusitis in children and adolescents with chronic or recurrent headache: a case–control study. *J. Headache Pain* 2008, 9, 33–36, doi:10.1007/s10194-008-0007-0.
95. Sindwani R, Wright ED. Role of endoscopic septoplasty in the treatment of atypical facial pain. *J Otolaryngol* 2003;32:77–80.
96. Smith BC, George LC, Svider PF, Nebor I, Folbe AJ, Sheyn A, et al. Rhinogenic headache in pediatric and adolescent patients: an evidence-based review. *Int Forum Allergy Rhinol* 2019;9:443–51. <https://doi.org/10.1002/alr.22268>.
97. Sollini G, Mazzola F, Iandelli A, Carobbio A, Barbieri A, Mora R, et al. Sino-Nasal Anatomical Variations in Rhinogenic Headache Pathogenesis: *Journal of Craniofacial Surgery* 2019;30:1503–5. <https://doi.org/10.1097/SCS.0000000000005239>.
98. Stammberger H, Wolf G. Headaches and Sinus Disease: The Endoscopic Approach. *Ann Otol Rhinol Laryngol* 1988;97:3–23. <https://doi.org/10.1177/000348948809705501>.
99. Swain SK, Behera IC, Mohanty S, Sahu MC. Rhinogenic contact point headache – Frequently missed clinical entity. *Apollo Medicine* 2016;13:169–73. <https://doi.org/10.1016/j.apme.2016.08.001>.
100. Tosun F, Gerek M, Ozkaptan Y. Nasal Surgery for Contact Point Headaches. *Headache* 2000;40:237–40. <https://doi.org/10.1046/j.1526-4610.2000.00034.x>.
101. Wang J, Yin J-S, Peng H. Investigation of diagnosis and surgical treatment of mucosal contact point headache. *Ear Nose Throat J* 2016;95:E39–44.
102. Wang J, Yin J, Peng H. Diagnosis and Surgical Treatment of Mucosal Contact Point Headache: Mucosal Contact Point Headache May Not be Accurately Diagnosed before Surgery. *SM Otolaryngology* 2017;1:1003.
103. Wee JH, Lee J-E, Hong S-L, Shin JM, Kim D-Y. Prospective Study on the Characteristics and Postoperative Improvement of Rhinogenic Headache. *J Rhinol* 2015;22:6. <https://doi.org/10.18787/jr.2015.22.1.6>.
104. Welge-Luessen A, Hauser R, Schmid N, Kappos L, Probst R. Endonasal Surgery for Contact Point Headaches: A 10-Year Longitudinal Study: *The Laryngoscope* 2003;113:2151–6. <https://doi.org/10.1097/00005537-200312000-00019>.
105. West B, Jones NS. Endoscopy-Negative, Computed Tomography-Negative Facial Pain in a Nasal Clinic: *The Laryngoscope* 2001;111:581–6. <https://doi.org/10.1097/00005537-200104000-00006>.
106. Wilkie MD, Leong SC. Nonsinogenic facial pain and the role of the sino-nasal outcome test. *Pain Management* 2015;5:157–60. <https://doi.org/10.2217/pmt.15.11>.
107. Yarmohammadi ME, Ghasemi H, Pourfarzam S, Nadoushan MRJ, Majd SA. Effect of turbinoplasty in concha bullosa induced rhinogenic headache, a randomized clinical trial. *J Res Med Sci* 2012;17:229–34.
108. Yazici ZM, Cabalar M, Sayin İ, Kayhan FT, Gurer E, Yayla V. Rhinologic Evaluation in Patients With Primary Headache: *Journal of Craniofacial Surgery* 2010;21:1688–91. <https://doi.org/10.1097/SCS.0b013e3181f3c666>.
